# Supplementary material for: Oral Cavity Reconstruction over a 30-Year Period at a Dedicated Tertiary Head and Neck Cancer Centre
Source: Springer Nature journal article supplement (doi:10.1007/s12262-022-03336-0), 2022-02-18
Supplement: MOESM1 [file 20146598]

| **Supporting information – T category frequency by time period – n, (row %)** | | | | | | | | | | | | | | | |
| --- | --- | --- | --- | --- | --- | --- | --- | --- | --- | --- | --- | --- | --- | --- | --- |
|  | | **T Category** | | | | | | | | |  | | |
| **Surgery Date** | | | **1** | | **2** | | **3** | | **4** | | | **Total** | | |
| Pre-1995 |  | | 52 (37.6) |  | 51 (36.9) |  | 11 (8.0) |  | 24 (17.4) |  | | **138 (100)** |  | |
| 1995-1999 |  | | 39 (26.9) |  | 50 (34.5) |  | 19 (13.1) |  | 37 (25.5) |  | | **145 (100)** |  | |
| 2000-2004 |  | | 47 (31.1) |  | 59 (39.1) |  | 20 (13.2) |  | 25 (16.6) |  | | **151 (100)** |  | |
| 2005-2009 |  | | 53 (33.1) |  | 50 (31.3) |  | 23 (14.4) |  | 34 (21.3) |  | | **160 (100)** |  | |
| 2010-2014 |  | | 59 (32.6) |  | 70 (38.7) |  | 16 (8.8) |  | 36 (19.9) |  | | **181 (100)** |  | |
| 2015-above |  | | 18 (23.7) |  | 25 (32.9) |  | 3 (3.9) |  | 30 (39.5) |  | | **76 (100)** |  | |
| **Total** |  | | **268 (31.5)** |  | **305 (35.8)** |  | **92 (10.8)** |  | **186 (21.9)** |  | | **851 (100)** |  | |
